# Supplementary material for: Trace detection of aminoglutethimide drug by surface-enhanced Raman spectroscopy: a vibrational and adsorption study on gold nanoparticles
Source: Royal Society of Chemistry journal article supplement (doi:10.1039/c1ay05032j), 2011-01-01
Supplement: c1ay05032j.pdf [file c1ay05032j.pdf]

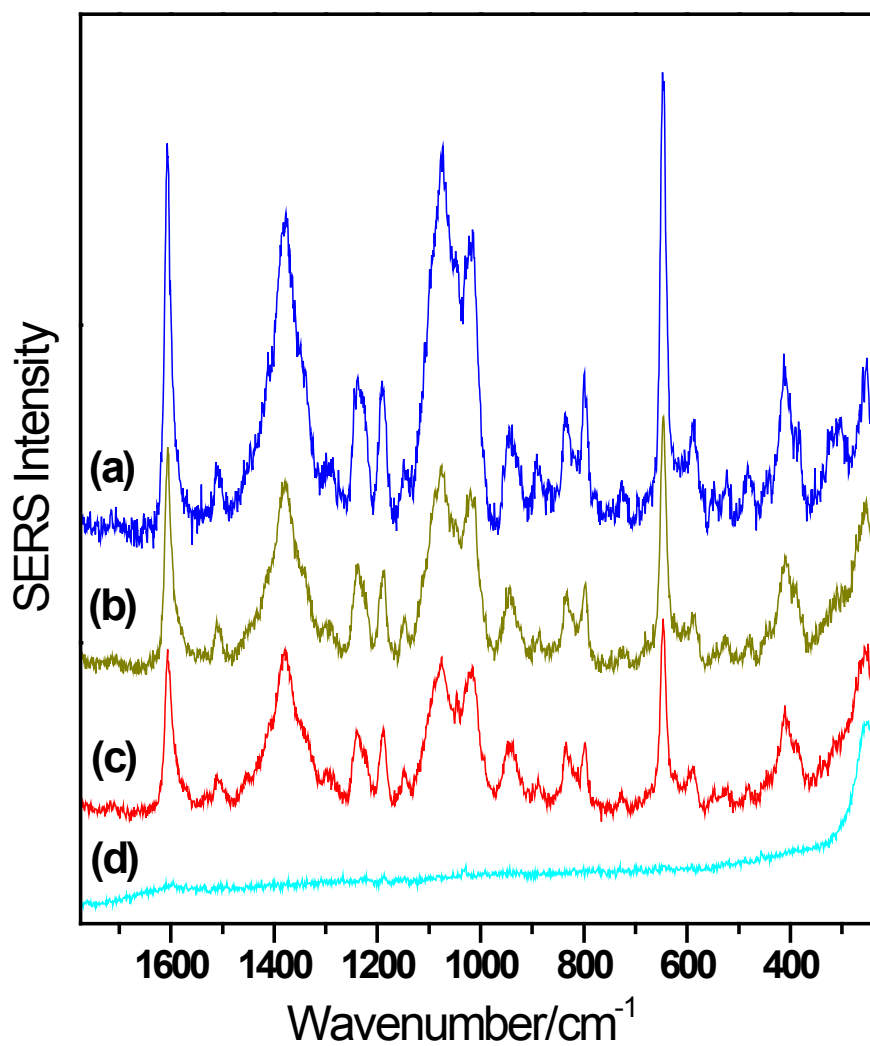

**Figure 1S.** SERS spectra of AGI on gold colloid at pH 5.0 registered for the following AGI concentrations: a)  $10^{-4}$  M, b)  $10^{-5}$  M, c)  $5 \times 10^{-6}$  M, d)  $5 \times 10^{-7}$  M. All the spectra were normalized to the nitrate band at 250 cm<sup>-1</sup>. Excitation at 632.8 nm.
